# Supplementary material for: Cerebral vasoreactivity in response to a head-of-bed position change is altered in patients with moderate and severe obstructive sleep apnea
Source: PubMed Central journal article supplement (PMC5851619; doi:10.1371/journal.pone.0194204), 2018-03-14
Supplement: pone.0194204.s001.pdf [file pone.0194204.s001.pdf]

S1 Table: Correlations with optical study results, sleep study results and demographics of all subjects measured.

| <b>r<sub>Spearman</sub> (p)</b> | <b>rCBF<sub>30° to supine</sub> (%)</b> | <b>Mean SpO<sub>2</sub> (%)</b> | <b>AHI (n/hour)</b> | <b>ODI4 (%)</b> | <b>CT90 (%)</b> |
|---------------------------------|-----------------------------------------|---------------------------------|---------------------|-----------------|-----------------|
| <b>Mean SpO<sub>2</sub> (%)</b> | -0.34 (0.002)*                          |                                 |                     |                 |                 |
| <b>AHI (n/hour)</b>             | 0.30 (0.007)*                           | -0.58 (<0.001)*                 |                     |                 |                 |
| <b>ODI4 (%)</b>                 | 0.22 (0.048)*                           | -0.57 (<0.001)*                 | 0.92 (<0.001)*      |                 |                 |
| <b>CT90 (%)</b>                 | 0.31 (0.005)*                           | -0.76 (<0.001)*                 | 0.85 (<0.001)*      | 0.81 (<0.001)*  |                 |
| <b>BMI (kg/cm<sup>2</sup>)</b>  | 0.31 (0.005)*                           | -0.53 (<0.001)*                 | 0.57 (<0.001)*      | 0.56 (<0.001)*  | 0.59 (<0.001)*  |

Spearman correlations shown.\* indicates a statistically significant correlation.

rCBF, relative cerebral blood flow; SpO<sub>2</sub>, arterial oxygen saturation by pulse oximetry; AHI, apnea-hypopnea index; ODI4, 4% oxygen desaturation index; CT90, % of total sleep time with SpO<sub>2</sub> lower than 90%; BMI, body mass index.
