# Supplementary material for: Cerebral vasoreactivity in response to a head-of-bed position change is altered in patients with moderate and severe obstructive sleep apnea
Source: PubMed Central journal article supplement (PMC5851619; doi:10.1371/journal.pone.0194204), 2018-03-14
Supplement: pone.0194204.s002.pdf [file pone.0194204.s002.pdf]

S2 Table: Sleep study results, demographics, clinical characteristics, and optical study results of every patient measured.

| ID | Positional change | Patient type | AHI (n./hour) | Mean SpO <sub>2</sub> (%) | ODI4 (%) | CT90 (%) | Male (yes=0) | Age (y.) | Weight (Kg) | Height (m) | Smoking (current/exsmoker=1) | AHT (yes=1) | DM (yes=1) | DLP (yes=1) | Epworth | rCBF (%) |
|----|-------------------|--------------|---------------|---------------------------|----------|----------|--------------|----------|-------------|------------|------------------------------|-------------|------------|-------------|---------|----------|
| 2  | 0° to 30°         | severe       | 74.8          | 92                        | 63       | 19.3     | 0            | 65       | 88.6        | 1.65       | 1                            | 1           | 0          | 0           | 8       | -21.03   |
| 2  | 30° to 0°         | severe       | 74.8          | 92                        | 63       | 19.3     | 0            | 65       | 88.6        | 1.65       | 1                            | 1           | 0          | 0           | 8       | -9.62    |
| 3  | 0° to 30°         | severe       | 99.5          | 92                        | 73.7     | 22.8     | 1            | 63       | 94          | 1.59       | 0                            | 1           | 1          | 0           | 15      | -24.64   |
| 3  | 30° to 0°         | severe       | 99.5          | 92                        | 73.7     | 22.8     | 1            | 63       | 94          | 1.59       | 0                            | 1           | 1          | 0           | 15      | 32.74    |
| 4  | 0° to 30°         | severe       | 82.5          | 91                        | 75.8     | 25.8     | 0            | 54       | 87.6        | 1.65       | 1                            | 1           | 0          | 0           | 14      | -15.58   |
| 4  | 30° to 0°         | severe       | 82.5          | 91                        | 75.8     | 25.8     | 0            | 54       | 87.6        | 1.65       | 1                            | 1           | 0          | 0           | 14      | -4.92    |
| 5  | 0° to 30°         | severe       | 74.2          | 94                        | 78.4     | 10.8     | 0            | 54       | 86.2        | 1.76       | 1                            | 1           | 0          | 0           | 7       | -21.3    |
| 5  | 30° to 0°         | severe       | 74.2          | 94                        | 78.4     | 10.8     | 0            | 54       | 86.2        | 1.76       | 1                            | 1           | 0          | 0           | 7       | 0.36     |
| 6  | 0° to 30°         | severe       | 72.8          | 89                        | 68.9     | 38       | 0            | 73       | 90          | 1.61       | 0                            | 1           | 0          | 0           | 6       | 4.93     |
| 6  | 30° to 0°         | severe       | 72.8          | 89                        | 68.9     | 38       | 0            | 73       | 90          | 1.61       | 0                            | 1           | 0          | 0           | 6       | 9.52     |
| 8  | 0° to 30°         | severe       | 91.1          | 86                        | 88       | 58.6     | 0            | 49       | 152         | 1.81       | 1                            | 0           | 0          | 0           | 23      | -10.59   |
| 8  | 30° to 0°         | severe       | 91.1          | 86                        | 88       | 58.6     | 0            | 49       | 152         | 1.81       | 1                            | 0           | 0          | 0           | 23      | 10.39    |
| 9  | 0° to 30°         | severe       | 96.2          | 90                        | 85.3     | 41.7     | 1            | 47       | 79.4        | 1.6        | 0                            | 0           | 0          | 0           | 20      | -7.64    |
| 9  | 30° to 0°         | severe       | 96.2          | 90                        | 85.3     | 41.7     | 1            | 47       | 79.4        | 1.6        | 0                            | 0           | 0          | 0           | 20      | 11.85    |
| 11 | 0° to 30°         | severe       | 79.8          | 92                        | 66.2     | 23.1     | 0            | 69       | 100         | 1.73       | 1                            | 0           | 1          | 1           | 9       | -16.17   |
| 11 | 30° to 0°         | severe       | 79.8          | 92                        | 66.2     | 23.1     | 0            | 69       | 100         | 1.73       | 1                            | 0           | 1          | 1           | 9       | 12.47    |
| 13 | 0° to 30°         | severe       | 78.1          | 93                        | 72.4     | 16.9     | 0            | 58       | 114         | 1.81       | 1                            | 1           | 0          | 0           | 9       | -28.33   |
| 13 | 30° to 0°         | severe       | 78.1          | 93                        | 72.4     | 16.9     | 0            | 58       | 114         | 1.81       | 1                            | 1           | 0          | 0           | 9       | 6.71     |
| 14 | 0° to 30°         | severe       | 97.5          | 95                        | 96.3     | 14       | 0            | 48       | 110         | 1.79       | 1                            | 1           | 0          | 0           | 10      | -28.5    |
| 14 | 30° to 0°         | severe       | 97.5          | 95                        | 96.3     | 14       | 0            | 48       | 110         | 1.79       | 1                            | 1           | 0          | 0           | 10      | 35.57    |
| 15 | 0° to 30°         | severe       | 93.7          | 91                        | 31       | 27.4     | 1            | 67       | 118         | 1.62       | 1                            | 1           | 0          | 1           | 2       | -24.74   |
| 15 | 30° to 0°         | severe       | 93.7          | 91                        | 31       | 27.4     | 1            | 67       | 118         | 1.62       | 1                            | 1           | 0          | 1           | 2       | 7.55     |

|    |           |        |      |    |      |      |   |    |      |      |   |   |   |   |    |        |
|----|-----------|--------|------|----|------|------|---|----|------|------|---|---|---|---|----|--------|
| 16 | 0° to 30° | severe | 36.1 | 93 | 36.4 | 14   | 0 | 62 | 96.6 | 1.71 | 0 | 1 | 1 | 0 | 13 | -9.1   |
| 16 | 30° to 0° | severe | 36.1 | 93 | 36.4 | 14   | 0 | 62 | 96.6 | 1.71 | 0 | 1 | 1 | 0 | 13 | 4.81   |
| 19 | 0° to 30° | severe | 77.4 | 93 | 73.8 | 26   | 0 | 54 | 137  | 1.71 | 1 | 1 | 1 | 1 | 2  | 1.98   |
| 19 | 30° to 0° | severe | 77.4 | 93 | 73.8 | 26   | 0 | 54 | 137  | 1.71 | 1 | 1 | 1 | 1 | 2  | 14.9   |
| 20 | 0° to 30° | severe | 93.7 | 94 | 85.5 | 8.6  | 0 | 62 | 108  | 1.69 | 1 | 0 | 1 | 0 | 10 | -34.9  |
| 20 | 30° to 0° | severe | 93.7 | 94 | 85.5 | 8.6  | 0 | 62 | 108  | 1.69 | 1 | 0 | 1 | 0 | 10 | -16.73 |
| 25 | 0° to 30° | severe | 46.1 | 96 | 45.9 | 5.2  | 0 | 57 | 89   | 1.65 | 1 | 1 | 0 | 0 | 15 | -16.25 |
| 25 | 30° to 0° | severe | 46.1 | 96 | 45.9 | 5.2  | 0 | 57 | 89   | 1.65 | 1 | 1 | 0 | 0 | 15 | 22.15  |
| 26 | 0° to 30° | severe | 55   | 94 | 54.2 | 3.8  | 0 | 53 | 125  | 1.74 | 1 | 1 | 0 | 0 | 14 | -16.39 |
| 26 | 30° to 0° | severe | 55   | 94 | 54.2 | 3.8  | 0 | 53 | 125  | 1.74 | 1 | 1 | 0 | 0 | 14 | -0.76  |
| 27 | 0° to 30° | severe | 71.2 | 86 | 70.5 | 58.3 | 0 | 53 | 89   | 1.58 | 1 | 1 | 0 | 1 | 23 | -2.85  |
| 27 | 30° to 0° | severe | 71.2 | 86 | 70.5 | 58.3 | 0 | 53 | 89   | 1.58 | 1 | 1 | 0 | 1 | 23 | 35.96  |
| 28 | 0° to 30° | severe | 50   | 94 | 50.4 | 10   | 0 | 47 | 96   | 1.84 | 1 | 0 | 0 | 0 | 16 | -1.45  |
| 28 | 30° to 0° | severe | 50   | 94 | 50.4 | 10   | 0 | 47 | 96   | 1.84 | 1 | 0 | 0 | 0 | 16 | 11.25  |
| 29 | 0° to 30° | severe | 77   | 93 | 55.4 | 15.5 | 1 | 64 | 72   | 1.56 | 0 | 0 | 0 | 0 | 12 | -18.83 |
| 29 | 30° to 0° | severe | 77   | 93 | 55.4 | 15.5 | 1 | 64 | 72   | 1.56 | 0 | 0 | 0 | 0 | 12 | -5.32  |
| 30 | 0° to 30° | severe | 34.2 | 91 | 35.4 | 12.7 | 0 | 57 | 98.2 | 1.78 | 1 | 0 | 1 | 1 | 15 | -15.64 |
| 30 | 30° to 0° | severe | 34.2 | 91 | 35.4 | 12.7 | 0 | 57 | 98.2 | 1.78 | 1 | 0 | 1 | 1 | 15 | 12.76  |
| 32 | 0° to 30° | severe | 35   | 92 | 17.8 | 3.4  | 0 | 62 | 85.6 | 1.65 | 1 | 1 | 0 | 0 | 2  | -11.17 |
| 32 | 30° to 0° | severe | 35   | 92 | 17.8 | 3.4  | 0 | 62 | 85.6 | 1.65 | 1 | 1 | 0 | 0 | 2  | 15.4   |
| 33 | 0° to 30° | severe | 47   | 94 | 42.6 | 8.6  | 0 | 47 | 82   | 1.79 | 0 | 0 | 0 | 0 | 11 | -21.09 |
| 33 | 30° to 0° | severe | 47   | 94 | 42.6 | 8.6  | 0 | 47 | 82   | 1.79 | 0 | 0 | 0 | 0 | 11 | 5.75   |
| 35 | 0° to 30° | severe | 43   | 93 | 39   | 12   | 0 | 58 | 87   | 1.8  | 1 | 0 | 0 | 0 | 15 | -22.48 |
| 35 | 30° to 0° | severe | 43   | 93 | 39   | 12   | 0 | 58 | 87   | 1.8  | 1 | 0 | 0 | 0 | 15 | -2.62  |
| 37 | 0° to 30° | severe | 33   | 94 | 19.1 | 0    | 0 | 73 | 82.6 | 1.6  | 1 | 1 | 1 | 1 | 3  | -8.73  |
| 37 | 30° to 0° | severe | 33   | 94 | 19.1 | 0    | 0 | 73 | 82.6 | 1.6  | 1 | 1 | 1 | 1 | 3  | 7.35   |
| 45 | 0° to 30° | severe | 33.8 | 95 | 19.3 | 0.8  | 1 | 64 | 66   | 1.6  | 0 | 0 | 0 | 0 | 6  | -31.14 |

|    |           |          |      |    |      |      |   |    |      |      |   |   |   |   |    |        |
|----|-----------|----------|------|----|------|------|---|----|------|------|---|---|---|---|----|--------|
| 45 | 30° to 0° | severe   | 33.8 | 95 | 19.3 | 0.8  | 1 | 64 | 66   | 1.6  | 0 | 0 | 0 | 0 | 6  | -5.83  |
| 47 | 0° to 30° | severe   | 71.5 | 91 | 64   | 31.4 | 0 | 61 | 118  | 1.66 | 1 | 1 | 1 | 1 | 14 | -1.73  |
| 47 | 30° to 0° | severe   | 71.5 | 91 | 64   | 31.4 | 0 | 61 | 118  | 1.66 | 1 | 1 | 1 | 1 | 14 | 11.06  |
| 63 | 0° to 30° | severe   | 92.1 | 90 | 92.6 | 43.3 | 0 | 47 | 93.2 | 1.72 | 1 | 0 | 0 | 0 | 22 | -36.02 |
| 63 | 30° to 0° | severe   | 92.1 | 90 | 92.6 | 43.3 | 0 | 47 | 93.2 | 1.72 | 1 | 0 | 0 | 0 | 22 | -15.39 |
| 77 | 0° to 30° | severe   | 69   | 93 | 59.6 | 21   | 1 | 61 | 75   | 1.6  | 0 | 0 | 0 | 0 | 11 | -15.29 |
| 77 | 30° to 0° | severe   | 69   | 93 | 59.6 | 21   | 1 | 61 | 75   | 1.6  | 0 | 0 | 0 | 0 | 11 | 2.12   |
| 17 | 0° to 30° | moderate | 19.5 | 93 | 21.8 | 3    | 0 | 66 | 91   | 1.7  | 0 | 0 | 0 | 0 | 2  | -22.43 |
| 17 | 30° to 0° | moderate | 19.5 | 93 | 21.8 | 3    | 0 | 66 | 91   | 1.7  | 0 | 0 | 0 | 0 | 2  | 1.28   |
| 21 | 0° to 30° | moderate | 20   | 94 | 8.2  | 2    | 0 | 61 | 98   | 1.69 | 1 | 0 | 0 | 0 | 7  | -15.5  |
| 21 | 30° to 0° | moderate | 20   | 94 | 8.2  | 2    | 0 | 61 | 98   | 1.69 | 1 | 0 | 0 | 0 | 7  | 15.01  |
| 22 | 0° to 30° | moderate | 24   | 95 | 24.7 | 7    | 0 | 52 | 61   | 1.57 | 0 | 0 | 0 | 0 | 2  | -16.06 |
| 22 | 30° to 0° | moderate | 24   | 95 | 24.7 | 7    | 0 | 52 | 61   | 1.57 | 0 | 0 | 0 | 0 | 2  | 10.66  |
| 31 | 0° to 30° | moderate | 19   | 93 | 13.5 | 4    | 1 | 50 | 71   | 1.56 | 1 | 0 | 0 | 0 | NA | -18.27 |
| 31 | 30° to 0° | moderate | 19   | 93 | 13.5 | 4    | 1 | 50 | 71   | 1.56 | 1 | 0 | 0 | 0 | NA | 10.17  |
| 38 | 0° to 30° | moderate | 19   | 96 | 17   | 0.1  | 1 | 55 | 75   | 1.58 | 0 | 0 | 0 | 0 | 12 | -19.74 |
| 38 | 30° to 0° | moderate | 19   | 96 | 17   | 0.1  | 1 | 55 | 75   | 1.58 | 0 | 0 | 0 | 0 | 12 | 6.17   |
| 39 | 0° to 30° | moderate | 19.4 | 94 | 4.1  | 0    | 1 | 62 | 65   | 1.58 | 0 | 0 | 0 | 0 | 10 | -23.05 |
| 39 | 30° to 0° | moderate | 19.4 | 94 | 4.1  | 0    | 1 | 62 | 65   | 1.58 | 0 | 0 | 0 | 0 | 10 | 11.7   |
| 41 | 0° to 30° | moderate | 17.8 | 96 | 18.2 | 0.2  | 1 | 48 | 167  | 1.74 | 1 | 1 | 0 | 0 | 7  | -13.39 |
| 41 | 30° to 0° | moderate | 17.8 | 96 | 18.2 | 0.2  | 1 | 48 | 167  | 1.74 | 1 | 1 | 0 | 0 | 7  | 1      |
| 42 | 0° to 30° | moderate | 17.2 | 96 | 8.8  | 0    | 0 | 69 | 81   | 1.79 | 1 | 0 | 1 | 1 | 10 | -18.47 |
| 42 | 30° to 0° | moderate | 17.2 | 96 | 8.8  | 0    | 0 | 69 | 81   | 1.79 | 1 | 0 | 1 | 1 | 10 | 12.04  |
| 44 | 0° to 30° | moderate | 17   | 95 | 10.4 | 0.7  | 0 | 44 | 75   | 1.69 | 1 | 0 | 0 | 0 | 15 | -10.72 |
| 44 | 30° to 0° | moderate | 17   | 95 | 10.4 | 0.7  | 0 | 44 | 75   | 1.69 | 1 | 0 | 0 | 0 | 15 | 22.69  |
| 48 | 0° to 30° | moderate | 15.8 | 95 | 17.1 | 2.2  | 0 | 53 | 76   | 1.74 | 1 | 1 | 0 | 0 | 3  | -10.07 |

|    |           |          |      |    |      |     |   |    |      |      |   |   |   |   |    |        |
|----|-----------|----------|------|----|------|-----|---|----|------|------|---|---|---|---|----|--------|
| 48 | 30° to 0° | moderate | 15.8 | 95 | 17.1 | 2.2 | 0 | 53 | 76   | 1.74 | 1 | 1 | 0 | 0 | 3  | 13.31  |
| 56 | 0° to 30° | moderate | 19   | 96 | 7    | 0.5 | 0 | 44 | 74   | 1.7  | 1 | 0 | 0 | 1 | 12 | -7.18  |
| 56 | 30° to 0° | moderate | 19   | 96 | 7    | 0.5 | 0 | 44 | 74   | 1.7  | 1 | 0 | 0 | 1 | 12 | 19.41  |
| 75 | 0° to 30° | moderate | 21   | 96 | 19   | 5.4 | 0 | 34 | 73   | 1.74 | 0 | 0 | 0 | 0 | 12 | -38.08 |
| 75 | 30° to 0° | moderate | 21   | 96 | 19   | 5.4 | 0 | 34 | 73   | 1.74 | 0 | 0 | 0 | 0 | 12 | -26.4  |
| 10 | 0° to 30° | mild     | 14.3 | 96 | 0    | 0   | 0 | 52 | 65.8 | 1.71 | 1 | 1 | 0 | 0 | 17 | -7.55  |
| 10 | 30° to 0° | mild     | 14.3 | 96 | 0    | 0   | 0 | 52 | 65.8 | 1.71 | 1 | 1 | 0 | 0 | 17 | 4.98   |
| 23 | 0° to 30° | mild     | 8    | 94 | 5.1  | 0.3 | 0 | 76 | 74   | 1.71 | 1 | 0 | 1 | 1 | 2  | -20.12 |
| 23 | 30° to 0° | mild     | 8    | 94 | 5.1  | 0.3 | 0 | 76 | 74   | 1.71 | 1 | 0 | 1 | 1 | 2  | -9.36  |
| 24 | 0° to 30° | mild     | 10.9 | 95 | 11.2 | 2.6 | 0 | 69 | 81.1 | 1.71 | 1 | 1 | 1 | 0 | 9  | -30.71 |
| 24 | 30° to 0° | mild     | 10.9 | 95 | 11.2 | 2.6 | 0 | 69 | 81.1 | 1.71 | 1 | 1 | 1 | 0 | 9  | 1.91   |
| 36 | 0° to 30° | mild     | 9.4  | 96 | 9.3  | 0   | 0 | 50 | 75   | 1.85 | 1 | 0 | 0 | 0 | 10 | -33.13 |
| 36 | 30° to 0° | mild     | 9.4  | 96 | 9.3  | 0   | 0 | 50 | 75   | 1.85 | 1 | 0 | 0 | 0 | 10 | -9.57  |
| 40 | 0° to 30° | mild     | 13.8 | 93 | 13.6 | 0.3 | 0 | 58 | 91.8 | 1.7  | 1 | 0 | 0 | 1 | 12 | -15.65 |
| 40 | 30° to 0° | mild     | 13.8 | 93 | 13.6 | 0.3 | 0 | 58 | 91.8 | 1.7  | 1 | 0 | 0 | 1 | 12 | 34.11  |
| 46 | 0° to 30° | mild     | 14   | 91 | 8.5  | 10  | 1 | 53 | 94   | 1.69 | 1 | 0 | 0 | 0 | 11 | -30.47 |
| 46 | 30° to 0° | mild     | 14   | 91 | 8.5  | 10  | 1 | 53 | 94   | 1.69 | 1 | 0 | 0 | 0 | 11 | 42.32  |
| 50 | 0° to 30° | mild     | 12   | 94 | 4    | 0.2 | 0 | 49 | 92   | 1.79 | 1 | 0 | 0 | 0 | 14 | -26.11 |
| 50 | 30° to 0° | mild     | 12   | 94 | 4    | 0.2 | 0 | 49 | 92   | 1.79 | 1 | 0 | 0 | 0 | 14 | 16.83  |
| 51 | 0° to 30° | mild     | 5    | 96 | 2.9  | 0   | 0 | 43 | 125  | 1.74 | 1 | 0 | 0 | 0 | 14 | -9.9   |
| 51 | 30° to 0° | mild     | 5    | 96 | 2.9  | 0   | 0 | 43 | 125  | 1.74 | 1 | 0 | 0 | 0 | 14 | 4.17   |
| 52 | 0° to 30° | mild     | 14.7 | 97 | 13.7 | 0   | 0 | 51 | 87.4 | 1.75 | 0 | 0 | 0 | 0 | 6  | -29.52 |
| 52 | 30° to 0° | mild     | 14.7 | 97 | 13.7 | 0   | 0 | 51 | 87.4 | 1.75 | 0 | 0 | 0 | 0 | 6  | -15.12 |
| 53 | 0° to 30° | mild     | 13.3 | 97 | 13.3 | 0   | 1 | 51 | 65.6 | 1.63 | 0 | 0 | 1 | 0 | 12 | -13.22 |
| 53 | 30° to 0° | mild     | 13.3 | 97 | 13.3 | 0   | 1 | 51 | 65.6 | 1.63 | 0 | 0 | 1 | 0 | 12 | -7.33  |
| 54 | 0° to 30° | mild     | 6    | 94 | 6.6  | 0   | 1 | 51 | 50   | 1.64 | 1 | 0 | 0 | 1 | 8  | -17.48 |
| 54 | 30° to 0° | mild     | 6    | 94 | 4    | 0   | 1 | 51 | 50   | 1.64 | 1 | 0 | 0 | 1 | 8  | 0.13   |

|    |           |      |      |    |      |     |   |    |      |      |   |   |   |   |    |        |
|----|-----------|------|------|----|------|-----|---|----|------|------|---|---|---|---|----|--------|
| 55 | 0° to 30° | mild | 10.4 | 97 | 7.7  | 0   | 1 | 69 | 74   | 1.62 | 0 | 0 | 0 | 0 | 6  | -13.95 |
| 55 | 30° to 0° | mild | 10.4 | 97 | 7.7  | 0   | 1 | 69 | 74   | 1.62 | 0 | 0 | 0 | 0 | 6  | 7.94   |
| 57 | 0° to 30° | mild | 9    | 99 | 0.2  | 0   | 1 | 54 | 58   | 1.4  | 0 | 0 | 0 | 0 | 16 | -15.87 |
| 57 | 30° to 0° | mild | 9    | 99 | 0.2  | 0   | 1 | 54 | 58   | 1.4  | 0 | 0 | 0 | 0 | 16 | 1.96   |
| 58 | 0° to 30° | mild | 5.5  | 98 | 0.9  | 0   | 0 | 41 | 73   | 1.64 | 1 | 0 | 0 | 0 | 20 | -20.54 |
| 58 | 30° to 0° | mild | 5.5  | 98 | 0.9  | 0   | 0 | 41 | 73   | 1.64 | 1 | 0 | 0 | 0 | 20 | -12.77 |
| 59 | 0° to 30° | mild | 9.3  | 94 | 1.9  | 0.2 | 1 | 59 | 83.4 | 1.61 | 1 | 0 | 0 | 0 | 17 | -8.1   |
| 59 | 30° to 0° | mild | 9.3  | 94 | 1.9  | 0.2 | 1 | 59 | 83.4 | 1.61 | 1 | 0 | 0 | 0 | 17 | 16.99  |
| 60 | 0° to 30° | mild | 14   | 92 | 4    | 15  | 0 | 69 | 108  | 1.69 | 1 | 0 | 0 | 0 | 10 | -29.31 |
| 60 | 30° to 0° | mild | 14   | 92 | 4    | 15  | 0 | 69 | 108  | 1.69 | 1 | 0 | 0 | 0 | 10 | -4.55  |
| 61 | 0° to 30° | mild | 5    | 95 | 5.1  | 0   | 0 | 72 | 83   | 1.65 | 0 | 0 | 0 | 0 | 8  | -1.19  |
| 61 | 30° to 0° | mild | 5    | 95 | 5.1  | 0   | 0 | 72 | 83   | 1.65 | 0 | 0 | 0 | 0 | 8  | 8.84   |
| 62 | 0° to 30° | mild | 12.5 | 95 | 16   | 0.4 | 0 | 38 | 98   | 1.63 | 1 | 0 | 0 | 0 | 8  | -19    |
| 62 | 30° to 0° | mild | 12.5 | 95 | 16   | 0.4 | 0 | 38 | 98   | 1.63 | 1 | 0 | 0 | 0 | 8  | 1.26   |
| 65 | 0° to 30° | mild | 6    | 96 | 5.7  | 0   | 0 | 41 | 68   | 1.66 | 0 | 0 | 0 | 0 | 14 | -21.54 |
| 65 | 30° to 0° | mild | 6    | 96 | 5.7  | 0   | 0 | 41 | 68   | 1.66 | 0 | 0 | 0 | 0 | 14 | -4     |
| 67 | 0° to 30° | mild | 9.7  | 94 | 1    | 3.2 | 1 | 68 | 71   | 1.63 | 0 | 0 | 0 | 1 | 13 | -23.12 |
| 67 | 30° to 0° | mild | 9.7  | 94 | 1    | 3.2 | 1 | 68 | 71   | 1.63 | 0 | 0 | 0 | 1 | 13 | 16.07  |
| 68 | 0° to 30° | mild | 6    | 94 | 5.1  | 0   | 0 | 31 | 74   | 1.57 | 1 | 0 | 0 | 0 | 2  | -17.45 |
| 68 | 30° to 0° | mild | 6    | 94 | 5.1  | 0   | 0 | 31 | 74   | 1.57 | 1 | 0 | 0 | 0 | 2  | 10.94  |
| 69 | 0° to 30° | mild | 5.6  | 98 | 5.1  | 0   | 0 | 31 | 88   | 1.76 | 1 | 0 | 0 | 0 | 12 | -18.61 |
| 69 | 30° to 0° | mild | 5.6  | 98 | 5.1  | 0   | 0 | 31 | 88   | 1.76 | 1 | 0 | 0 | 0 | 12 | -3.29  |
| 70 | 0° to 30° | mild | 9    | 93 | 5.7  | 0   | 0 | 54 | 98   | 1.85 | 1 | 0 | 0 | 0 | 15 | 4.36   |
| 70 | 30° to 0° | mild | 9    | 93 | 5.7  | 0   | 0 | 54 | 98   | 1.85 | 1 | 0 | 0 | 0 | 15 | -0.75  |
| 71 | 0° to 30° | mild | 8    | 95 | 10.4 | 0   | 1 | 61 | 59.8 | 1.64 | 1 | 0 | 0 | 0 | 5  | -8.73  |
| 71 | 30° to 0° | mild | 8    | 95 | 10.4 | 0   | 1 | 61 | 59.8 | 1.64 | 1 | 0 | 0 | 0 | 5  | 13.22  |
| 73 | 0° to 30° | mild | 10.5 | 96 | 11.1 | 0   | 1 | 60 | 64   | 1.5  | 0 | 0 | 0 | 1 | 15 | -11.31 |

|    |           |         |      |    |      |    |   |    |      |      |   |   |   |   |    |        |
|----|-----------|---------|------|----|------|----|---|----|------|------|---|---|---|---|----|--------|
| 73 | 30° to 0° | mild    | 10.5 | 96 | 11.1 | 0  | 1 | 60 | 64   | 1.5  | 0 | 0 | 0 | 1 | 15 | -5.93  |
| 76 | 0° to 30° | mild    | 7.6  | 97 | 0.2  | 0  | 0 | 36 | 65   | 1.71 | 0 | 0 | 0 | 0 | 16 | -31.22 |
| 76 | 30° to 0° | mild    | 7.6  | 97 | 0.2  | 0  | 0 | 36 | 65   | 1.71 | 0 | 0 | 0 | 0 | 16 | -10.08 |
| 79 | 0° to 30° | mild    | 9.4  | 96 | NA   | NA | 0 | 62 | 91   | 1.81 | 0 | 0 | 0 | 0 | 15 | -10.17 |
| 79 | 30° to 0° | mild    | 9.4  | 96 | NA   | NA | 0 | 62 | 91   | 1.81 | 0 | 0 | 0 | 0 | 15 | 4.89   |
| 87 | 0° to 30° | mild    | 10   | 95 | 10   | 0  | 1 | 57 | 57   | 1.53 | 0 | 0 | 0 | 0 | 5  | -23.86 |
| 87 | 30° to 0° | mild    | 10   | 95 | 10   | 0  | 1 | 57 | 57   | 1.53 | 0 | 0 | 0 | 0 | 5  | 4.6    |
| 43 | 0° to 30° | control | 3.8  | 96 | 3.2  | 0  | 0 | 57 | 79.4 | 1.67 | 1 | 0 | 0 | 0 | 14 | -28.77 |
| 43 | 30° to 0° | control | 3.8  | 96 | 3.2  | 0  | 0 | 57 | 79.4 | 1.67 | 1 | 0 | 0 | 0 | 14 | -15.01 |
| 72 | 0° to 30° | control | 1    | 95 | 0    | 0  | 1 | 55 | 59   | 1.59 | 0 | 0 | 0 | 0 | 0  | -19.26 |
| 72 | 30° to 0° | control | 1    | 95 | 0    | 0  | 1 | 55 | 59   | 1.59 | 0 | 0 | 0 | 0 | 0  | -2.77  |
| 74 | 0° to 30° | control | 0    | 97 | 1    | 0  | 0 | 41 | 72   | 1.7  | 1 | 0 | 0 | 0 | NA | -8.03  |
| 74 | 30° to 0° | control | 0    | 97 | 1    | 0  | 0 | 41 | 72   | 1.7  | 1 | 0 | 0 | 0 | NA | -2.02  |
| 80 | 0° to 30° | control | 1    | 94 | 1    | 0  | 1 | 46 | 72   | 1.65 | 0 | 0 | 0 | 0 | 5  | -7.85  |
| 80 | 30° to 0° | control | 1    | 94 | 1    | 0  | 1 | 46 | 72   | 1.65 | 0 | 0 | 0 | 0 | 5  | -11.13 |
| 81 | 0° to 30° | control | 1.6  | 96 | 1    | 0  | 1 | 56 | 62   | 1.66 | 1 | 0 | 0 | 0 | 10 | -38.19 |
| 81 | 30° to 0° | control | 1.6  | 96 | 1    | 0  | 1 | 56 | 62   | 1.66 | 1 | 0 | 0 | 0 | 10 | -16.06 |
| 82 | 0° to 30° | control | 4    | 93 | 3.5  | 1  | 0 | 29 | 73   | 1.72 | 0 | 0 | 0 | 0 | 8  | -17.66 |
| 82 | 30° to 0° | control | 4    | 93 | 3.5  | 1  | 0 | 29 | 73   | 1.72 | 0 | 0 | 0 | 0 | 8  | 1.8    |
| 83 | 0° to 30° | control | 2.3  | 95 | 2    | 0  | 1 | 57 | 84   | 1.52 | 1 | 0 | 0 | 0 | 6  | -17.69 |
| 83 | 30° to 0° | control | 2.3  | 95 | 2    | 0  | 1 | 57 | 84   | 1.52 | 1 | 0 | 0 | 0 | 6  | -7.51  |
| 84 | 0° to 30° | control | 4    | 96 | 0.2  | 0  | 1 | 53 | 58   | 1.53 | 0 | 0 | 0 | 0 | 9  | -25.77 |
| 84 | 30° to 0° | control | 4    | 96 | 0.2  | 0  | 1 | 53 | 58   | 1.53 | 0 | 0 | 0 | 0 | 9  | -8.86  |
| 86 | 0° to 30° | control | 1    | 94 | 1    | 0  | 1 | 52 | 59   | 1.57 | 0 | 0 | 0 | 0 | 0  | -20.43 |
| 86 | 30° to 0° | control | 1    | 94 | 1    | 0  | 1 | 52 | 59   | 1.57 | 0 | 0 | 0 | 0 | 0  | -3.74  |
| 88 | 0° to 30° | control | 3    | 95 | 3.4  | 0  | 0 | 55 | 108  | 1.82 | 1 | 0 | 0 | 0 | 8  | 2.79   |
| 88 | 30° to 0° | control | 3    | 95 | 3.4  | 0  | 0 | 55 | 108  | 1.82 | 1 | 0 | 0 | 0 | 8  | 15.3   |

|    |           |         |     |    |     |   |   |    |    |      |   |   |   |   |    |        |
|----|-----------|---------|-----|----|-----|---|---|----|----|------|---|---|---|---|----|--------|
| 89 | 0° to 30° | control | 1   | 95 | 0.8 | 0 | 0 | 40 | 71 | 1.74 | 0 | 0 | 0 | 0 | 7  | -12.19 |
| 89 | 30° to 0° | control | 1   | 95 | 0.8 | 0 | 0 | 40 | 71 | 1.74 | 0 | 0 | 0 | 0 | 7  | 12.13  |
| 91 | 0° to 30° | control | 3.9 | 98 | 0   | 0 | 1 | 29 | 45 | 1.69 | 0 | 0 | 0 | 0 | 16 | -21.68 |
| 91 | 30° to 0° | control | 3.9 | 98 | 0   | 0 | 1 | 29 | 45 | 1.69 | 0 | 0 | 0 | 0 | 16 | -3.91  |
| 92 | 0° to 30° | control | 1   | 96 | 0   | 0 | 1 | 26 | 58 | 1.62 | 0 | 0 | 0 | 0 | 0  | -17.1  |
| 92 | 30° to 0° | control | 1   | 96 | 0   | 0 | 1 | 26 | 58 | 1.62 | 0 | 0 | 0 | 0 | 0  | -9.32  |
| 93 | 0° to 30° | control | 4   | 96 | 3   | 0 | 1 | 58 | 59 | 1.58 | 0 | 0 | 0 | 1 | 5  | -9.76  |
| 93 | 30° to 0° | control | 4   | 96 | 3   | 0 | 1 | 58 | 59 | 1.58 | 0 | 0 | 0 | 1 | 5  | -10.6  |

AHI, apnea-hypopnea index; SpO<sub>2</sub>, arterial oxygen saturation by pulse oximetry; ODI4, 4% oxygen desaturation index; CT90, % of total sleep time with SpO<sub>2</sub> lower than 90%; AHT, arterial hypertension; DM, diabetes mellitus; DLP, dyslipidemia; rCBF, relative cerebral blood flow.
