# Supplementary material for: Cerebral vasoreactivity in response to a head-of-bed position change is altered in patients with moderate and severe obstructive sleep apnea
Source: PubMed Central journal article supplement (PMC5851619; doi:10.1371/journal.pone.0194204), 2018-03-14
Supplement: pone.0194204.s003.pdf [file pone.0194204.s003.pdf]

S3 Table: Pre-CPAP treatment a) demographics, clinical characteristics and b) sleep study results of the subgroup with severe OSA remeasured after two years of CPAP treatment, the subgroup with severe OSA measured one time, and all the group with severe OSA.

a)

|                                | <b>Severe OSA measured one time<br/>(n=15)</b> | <b>Severe OSA remeasured<br/>(n=13)</b> | <b>p</b> | <b>Severe OSA total<br/>(n=28)</b> |
|--------------------------------|------------------------------------------------|-----------------------------------------|----------|------------------------------------|
| <b>Age (y.)</b>                | 61 (53.5, 63)                                  | 57 (53, 63)                             | 0.764    | 58 (53, 63.3)                      |
| <b>Males n (%)</b>             | 12 (43)                                        | 10 (36)                                 | 0.871    | 22 (79)                            |
| <b>BMI (kg/cm<sub>2</sub>)</b> | 32 (30, 38)                                    | 33 (31, 36)                             | 0.964    | 33 (30, 36)                        |
| <b>AHT n (%)</b>               | 9 (32)                                         | 7 (25)                                  | 0.768    | 16 (57)                            |
| <b>Epworth</b>                 | 11 (3,14)                                      | 14 (9, 15)                              | 0.267    | 11.5 (7.5, 15)                     |

b)

|                                 |             |             |       |               |
|---------------------------------|-------------|-------------|-------|---------------|
| <b>AHI (n./hour)</b>            | 75 (43, 92) | 73 (47, 80) | 1     | 73.5 (47, 87) |
| <b>Mean SpO<sub>2</sub> (%)</b> | 93 (92, 94) | 92 (90, 94) | 0.273 | 93 (91, 94)   |
| <b>CT90 (%)</b>                 | 14 (9, 26)  | 23 (11, 38) | 0.279 | 16 (9, 27)    |
| <b>ODI4 (%)</b>                 | 55 (36, 76) | 69 (46, 74) | 0.525 | 63.5 (41, 75) |

Data shown as median (interquartile range) or number of cases (percentages).

BMI, body mass index; AHT, arterial hypertension; AHI, apnea-hypopnea index; SpO<sub>2</sub>, arterial oxygen saturation by pulse oximetry; CT90, % of total sleep time with SpO<sub>2</sub> lower than 90%; ODI4, 4% oxygen desaturation index; OSA, obstructive sleep apnea; CPAP, continuous positive airway pressure treatment.
