# Supplementary material for: Cerebral vasoreactivity in response to a head-of-bed position change is altered in patients with moderate and severe obstructive sleep apnea
Source: PubMed Central journal article supplement (PMC5851619; doi:10.1371/journal.pone.0194204), 2018-03-14
Supplement: pone.0194204.s004.pdf [file pone.0194204.s004.pdf]

S4 Table: Demographics, sleep study results, clinical characteristics, and optical study results of the severe obstructive sleep apnea patients measured before and after CPAP treatment.

| ID | Positional change | Male (yes=0) | Patient type | AHI (n./hour) | Mean SpO <sub>2</sub> (%) | ODI4 (%) | CT90 (%) | Smoking (current/exsmoker=1) | Age (y. pre-CPAP) | Height (m) | Weight pre-CPAP (Kg) | Weight post-CPAP (Kg) | AHT pre-CPAP (yes=1) | AHT post-CPAP (yes=1) | DM (yes=1) | DLP (yes=1) | Time under treatment between measurements (y.) | Epworth pre-CPAP | Epworth post-CPAP | rCBF (%) pre-CPAP | rCBF (%) post-CPAP |
|----|-------------------|--------------|--------------|---------------|---------------------------|----------|----------|------------------------------|-------------------|------------|----------------------|-----------------------|----------------------|-----------------------|------------|-------------|------------------------------------------------|------------------|-------------------|-------------------|--------------------|
| 3  | 0° to 30°         | 0            | severe       | 99.5          | 92                        | 73.7     | 22.8     | 0                            | 63                | 1.59       | 94.00                | 84.80                 | 1                    | 1                     | 1          | 0           | 2.5                                            | 15               | 2                 | -24.64            | -18.48             |
| 3  | 30° to 0°         | 0            | severe       | 99.5          | 92                        | 73.7     | 22.8     | 0                            | 63                | 1.59       | 94.00                | 84.80                 | 1                    | 1                     | 1          | 0           | 2.5                                            | 15               | 2                 | 32.74             | 6.48               |
| 5  | 0° to 30°         | 1            | severe       | 74.2          | 94                        | 78.4     | 10.8     | 1                            | 54                | 1.76       | 86.20                | 83.00                 | 1                    | 1                     | 0          | 0           | 2.4                                            | 7                | 0                 | -21.3             | -28.91             |
| 5  | 30° to 0°         | 1            | severe       | 74.2          | 94                        | 78.4     | 10.8     | 1                            | 54                | 1.76       | 86.20                | 83.00                 | 1                    | 1                     | 0          | 0           | 2.4                                            | 7                | 0                 | 0.36              | -0.36              |
| 6  | 0° to 30°         | 1            | severe       | 72.8          | 89                        | 69.8     | 38       | 0                            | 73                | 1.61       | 90.00                | 94.00                 | 1                    | 1                     | 0          | 0           | 2.4                                            | 6                | 0                 | 4.93              | -15.93             |
| 6  | 30° to 0°         | 1            | severe       | 72.8          | 89                        | 69.8     | 38       | 0                            | 73                | 1.61       | 90.00                | 94.00                 | 1                    | 1                     | 0          | 0           | 2.4                                            | 6                | 0                 | 9.52              | 14.77              |
| 8  | 0° to 30°         | 1            | severe       | 91.1          | 86                        | 88       | 58.6     | 1                            | 49                | 1.81       | 152.00               | 154.80                | 0                    | 0                     | 0          | 0           | 2.5                                            | 23               | 6                 | -10.59            | -13.74             |
| 8  | 30° to 0°         | 1            | severe       | 91.1          | 86                        | 88       | 58.6     | 1                            | 49                | 1.81       | 152.00               | 154.80                | 0                    | 0                     | 0          | 0           | 2.5                                            | 23               | 6                 | 10.39             | -3.81              |
| 9  | 0° to 30°         | 0            | severe       | 96.2          | 90                        | 85.3     | 41.7     | 0                            | 47                | 1.6        | 79.40                | 78.80                 | 0                    | 0                     | 0          | 0           | 2.4                                            | 20               | 10                | -7.64             | -1.51              |
| 9  | 30° to 0°         | 0            | severe       | 96.2          | 90                        | 85.3     | 41.7     | 0                            | 47                | 1.6        | 79.40                | 78.80                 | 0                    | 0                     | 0          | 0           | 2.4                                            | 20               | 10                | 11.85             | 11.72              |
| 11 | 0° to 30°         | 1            | severe       | 79.8          | 92                        | 66.2     | 23.1     | 1                            | 68                | 1.73       | 100.00               | 98.40                 | 0                    | 1                     | 1          | 1           | 2.3                                            | 9                | 6                 | -16.17            | -16.67             |
| 11 | 30° to 0°         | 1            | severe       | 79.8          | 92                        | 66.2     | 23.1     | 1                            | 68                | 1.73       | 100.00               | 98.40                 | 0                    | 1                     | 1          | 1           | 2.3                                            | 9                | 6                 | 12.47             | 4.54               |
| 13 | 0° to 30°         | 1            | severe       | 78.1          | 93                        | 72.4     | 16.9     | 1                            | 58                | 1.81       | 114.00               | 112.20                | 1                    | 1                     | 0          | 0           | 2.3                                            | 9                | 4                 | -28.33            | -30.13             |
| 13 | 30° to 0°         | 1            | severe       | 78.1          | 93                        | 72.4     | 16.9     | 1                            | 58                | 1.81       | 114.00               | 112.20                | 1                    | 1                     | 0          | 0           | 2.3                                            | 9                | 4                 | 6.71              | -2.69              |
| 25 | 0° to 30°         | 1            | severe       | 46.1          | 96                        | 45.9     | 5.2      | 1                            | 57                | 1.65       | 89.00                | 100.00                | 1                    | 1                     | 0          | 1           | 1.7                                            | 15               | 8                 | -16.25            | -10.09             |
| 25 | 30° to 0°         | 1            | severe       | 46.1          | 96                        | 45.9     | 5.2      | 1                            | 57                | 1.65       | 89.00                | 100.00                | 1                    | 1                     | 0          | 1           | 1.7                                            | 15               | 8                 | 22.15             | 26.2               |
| 27 | 0° to 30°         | 1            | severe       | 71.2          | 86                        | 70.5     | 58.3     | 1                            | 53                | 1.58       | 89.00                | 90.00                 | 1                    | 1                     | 0          | 1           | 2.0                                            | 23               | 13                | -2.85             | -8.1               |
| 27 | 30° to 0°         | 1            | severe       | 71.2          | 86                        | 70.5     | 58.3     | 1                            | 53                | 1.58       | 89.00                | 90.00                 | 1                    | 1                     | 0          | 1           | 2.0                                            | 23               | 13                | 35.96             | 4.51               |
| 30 | 0° to 30°         | 1            | severe       | 34.2          | 91                        | 35.4     | 18.7     | 1                            | 57                | 1.78       | 98.20                | 104.60                | 1                    | 1                     | 0          | 1           | 2.0                                            | 15               | 8                 | -15.64            | -2.52              |
| 30 | 30° to 0°         | 1            | severe       | 34.2          | 91                        | 35.4     | 18.7     | 1                            | 57                | 1.78       | 98.20                | 104.60                | 1                    | 1                     | 0          | 1           | 2.0                                            | 15               | 8                 | 12.76             | 20.29              |
| 33 | 0° to 30°         | 1            | severe       | 46.5          | 94                        | 42.6     | 8.6      | 0                            | 47                | 1.79       | 82.00                | 83.40                 | 0                    | 0                     | 0          | 0           | 2.0                                            | 11               | 5                 | -21.09            | -20.87             |
| 33 | 30° to 0°         | 1            | severe       | 46.5          | 94                        | 42.6     | 8.6      | 0                            | 47                | 1.79       | 82.00                | 83.40                 | 0                    | 0                     | 0          | 0           | 2.0                                            | 11               | 5                 | 5.75              | -5.75              |
| 45 | 0° to 30°         | 0            | severe       | 33.8          | 95                        | 19.3     | 0.8      | 0                            | 67                | 1.6        | 66.00                | 67.20                 | 0                    | 0                     | 0          | 1           | 1.8                                            | 6                | 6                 | -31.14            | -32.84             |

|    |           |   |        |      |    |      |      |   |    |      |        |        |   |   |   |   |     |    |   |       |        |
|----|-----------|---|--------|------|----|------|------|---|----|------|--------|--------|---|---|---|---|-----|----|---|-------|--------|
| 45 | 30° to 0° | 0 | severe | 33.8 | 95 | 19.3 | 0.8  | 0 | 67 | 1.6  | 66.00  | 67.20  | 0 | 0 | 0 | 1 | 1.8 | 6  | 6 | -5.83 | -11.64 |
| 47 | 0° to 30° | 1 | severe | 71.5 | 91 | 64   | 31.4 | 1 | 62 | 1.66 | 118.00 | 115.00 | 1 | 1 | 1 | 1 | 1.7 | 14 | 4 | -1.73 | 14.62  |
| 47 | 30° to 0° | 1 | severe | 71.5 | 91 | 64   | 31.4 | 1 | 62 | 1.66 | 118.00 | 115.00 | 1 | 1 | 1 | 1 | 1.7 | 14 | 4 | 11.06 | 11.08  |

AHI, apnea-hypopnea index; SpO<sub>2</sub>, arterial oxygen saturation by pulse oximetry; ODI4, 4% oxygen desaturation index; CT90, % of total sleep time with SpO<sub>2</sub> lower than 90%; CPAP, continuous positive airway pressure; AHT, arterial hypertension; DM, diabetes mellitus; DLP, dyslipidemia; rCBF, relative cerebral blood flow.
